# Supplementary material
Source: Research Square preprint supplement (doi:10.21203/rs.3.rs-9407045/v1)
Supplement: Supplementary file 1 [file 9d4e0d077471864aefe5d085.pdf]

# Supplementary Information

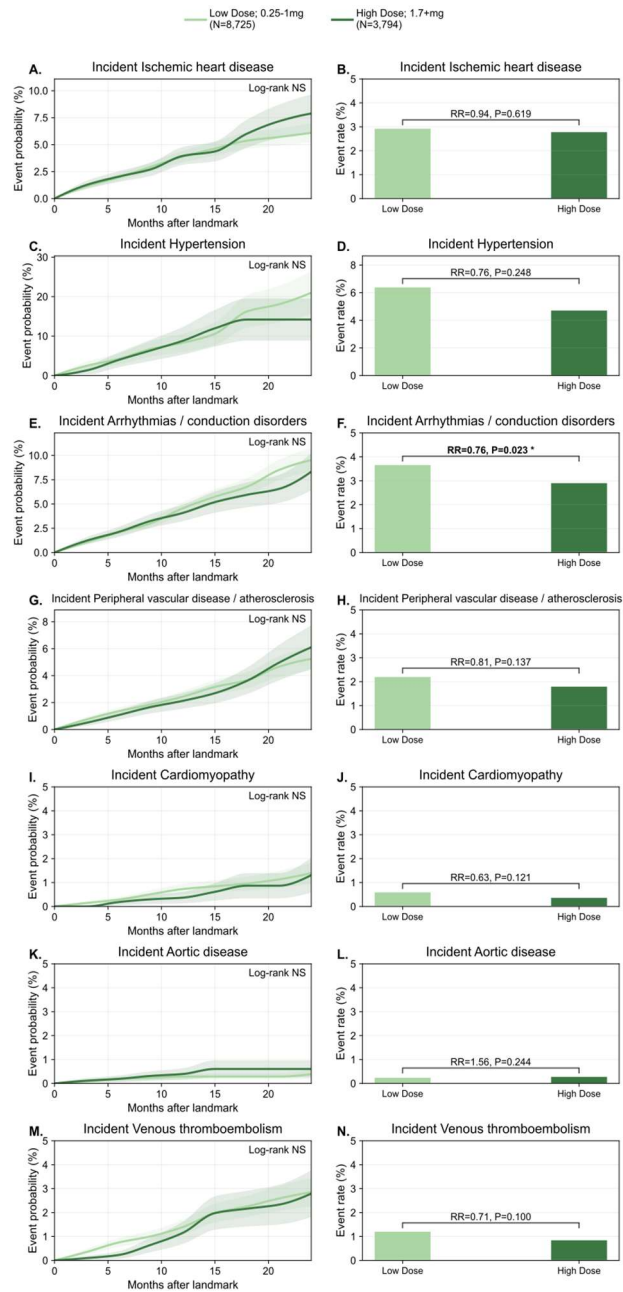

**Fig. S1. Higher maximum semaglutide dose was associated with lower post-landmark incidence of select cardiovascular conditions.** Patients were grouped by the maximum semaglutide dose reached by the 2-year landmark as low dose (0.25–1.0 mg; n = 8,725) or high dose ( $\geq 1.7$  mg; n = 3,794), and incident cardiovascular outcomes were assessed only after the landmark among patients event-free through that timepoint. Left-column panels show cumulative post-landmark event probability over follow-up for incident ischemic heart disease (A), incident hypertension (C), incident arrhythmias/conduction disorders (E), incident peripheral vascular disease/atherosclerosis (G), incident cardiomyopathy (I), incident aortic disease (K), and incident venous thromboembolism (M). Right-column panels show the corresponding post-landmark event rates with relative risks (RR) and nominal P values for incident ischemic heart disease (B), incident hypertension (D), incident arrhythmias/conduction disorders (F), incident peripheral vascular disease/atherosclerosis (H), incident cardiomyopathy (J), incident aortic disease (L), and incident venous thromboembolism (N).

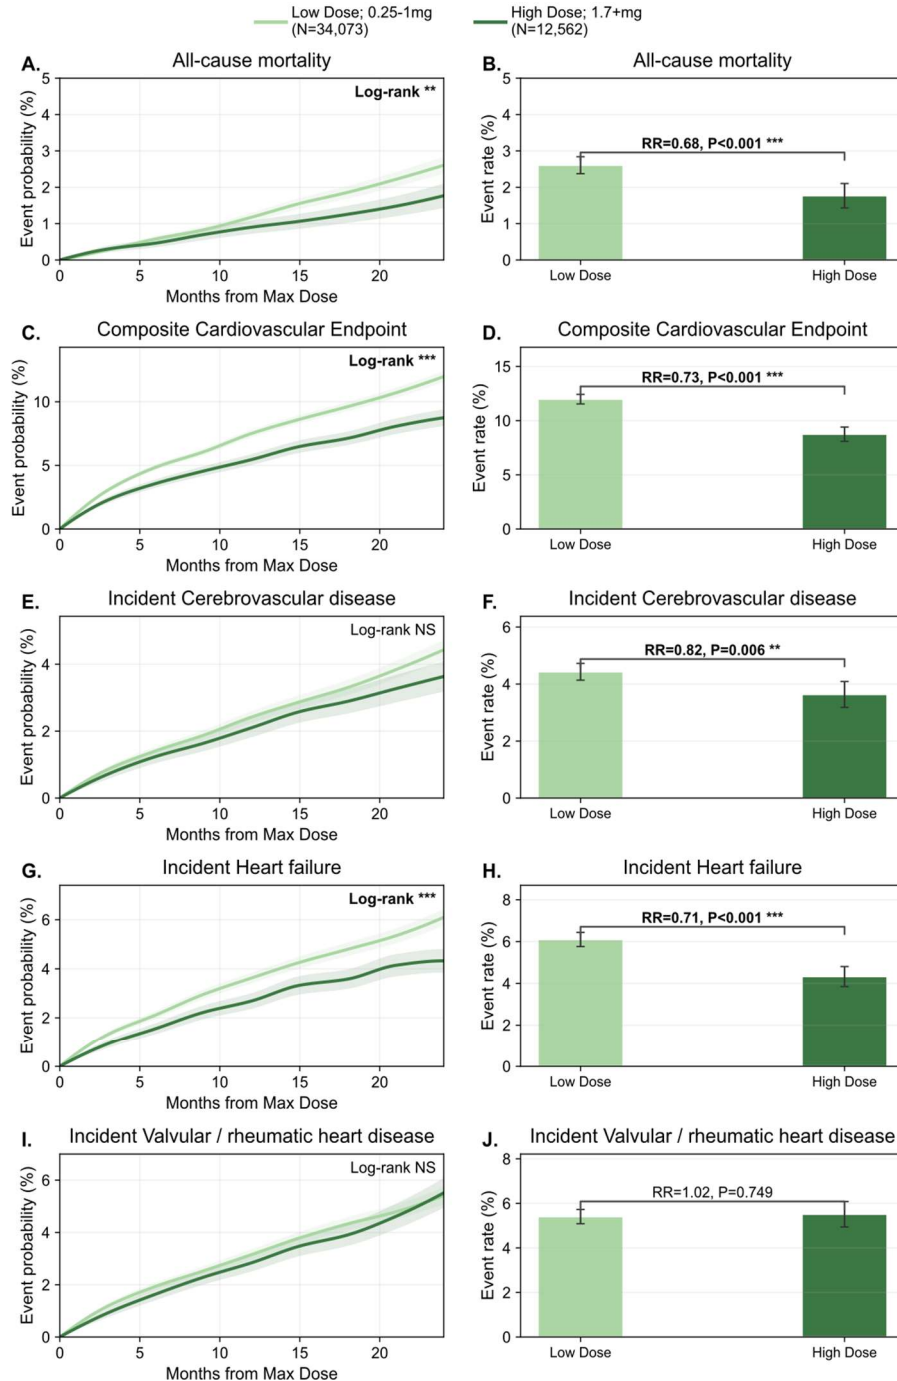

**Fig. S2.** Higher maximum semaglutide dose was associated with lower cardiovascular risk. Patients with at least one cardiovascular condition were grouped by the maximum semaglutide dose reached within a 2-year observation window as low dose (0.25–1.0 mg; n=34,073) or high dose ( $\geq 1.7$  mg; n=12,562). For each patient, outcomes were tracked from the date they first achieved their maximum dose, with follow-up extending up to 24 months thereafter. Left-column panels show cumulative event probability and right-column panels show the corresponding 24-month event rates for all-cause mortality (A, B), composite cardiovascular events (C, D), incident cerebrovascular disease (E, F), incident heart failure (G, H), and incident valvular/rheumatic heart disease (I, J). Error bars represent 95% confidence intervals derived from Greenwood's formula; relative risks and nominal P values comparing high versus low dose are shown on the bar plots. Higher-dose semaglutide was associated with lower risk across all outcomes examined.

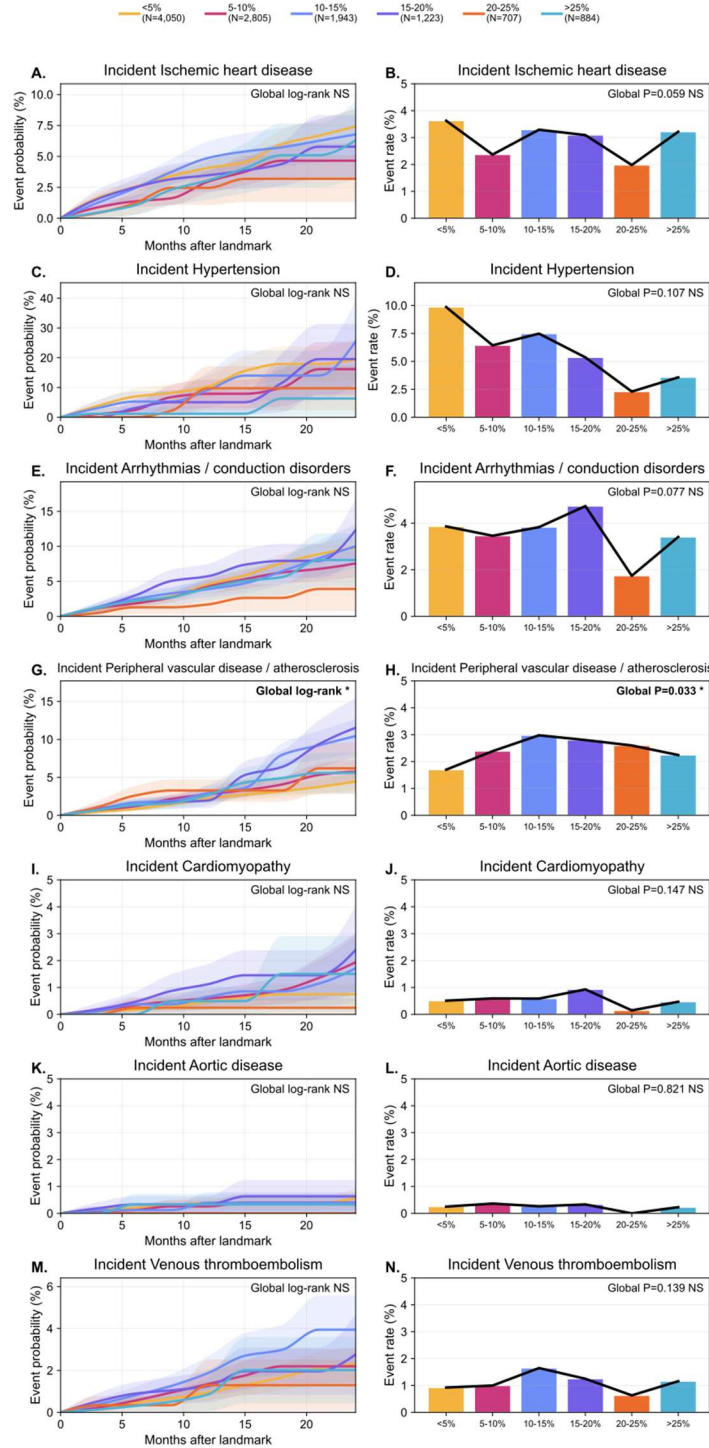

**Fig. S3. Semaglutide 2-year maximum weight-loss landmark analysis: incident cardiovascular conditions by weight-loss category.** Patients were categorized according to the maximum percentage reduction in body weight achieved before the 2-year landmark as <5% (n = 4,050), 5–10% (n = 2,805), 10–15% (n = 1,943), 15–20% (n = 1,223), 20–25% (n = 707), or >25% (n = 884), and incident cardiovascular outcomes were assessed only after the landmark among patients event-free through that timepoint. Left-column panels show cumulative post-landmark event probability over follow-up for incident ischemic heart disease (A), incident hypertension (C), incident arrhythmias/conduction disorders (E), incident peripheral vascular disease/atherosclerosis (G), incident cardiomyopathy (I), incident aortic disease (K), and incident venous thromboembolism (M). Right-column panels show the corresponding post-landmark event rates across weight-loss categories for incident ischemic heart disease (B), incident hypertension (D), incident arrhythmias/conduction disorders (F), incident peripheral vascular disease/atherosclerosis (H), incident cardiomyopathy (J), incident aortic disease (L), and incident venous thromboembolism (N), with global P values indicated.

2 year event risk difference: Semaglutide vs Comparator

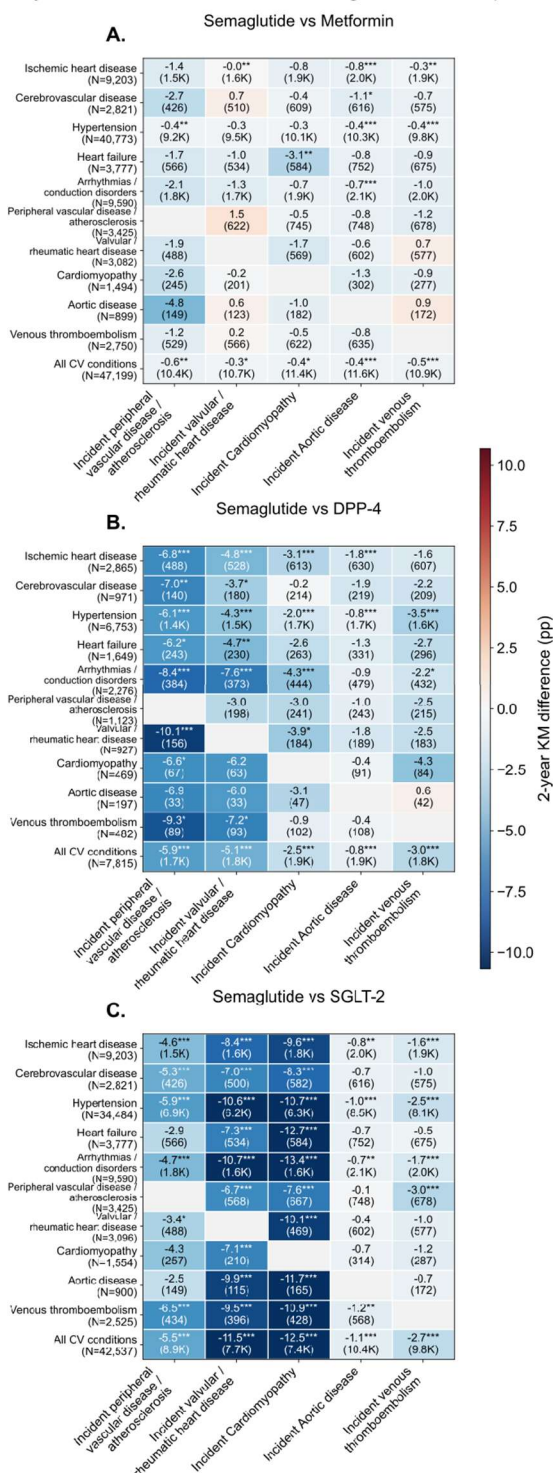

**Fig. S4. Semaglutide vs comparator anti-diabetic drugs' absolute 2-year event risk differences across baseline cardiovascular burden subgroups for additional cardiovascular outcomes.** (A) Semaglutide vs Metformin; (B) Semaglutide vs DPP-4 inhibitors; (C) Semaglutide vs SGLT-2 inhibitors. Heatmaps show absolute 2-year event risk differences across baseline cardiovascular burden subgroups. Rows indicate baseline cardiovascular burden subgroups, whereas columns indicate incident peripheral vascular disease/atherosclerosis, valvular/rheumatic heart disease, cardiomyopathy, aortic disease, and venous thromboembolism. Cell values represent the difference in approximate 2-year event risk between semaglutide and the respective comparator, expressed in percentage points (pp). Asterisks denote statistical significance (\*  $p < 0.05$ , \*\*  $p < 0.01$ , \*\*\*  $p < 0.001$ ).



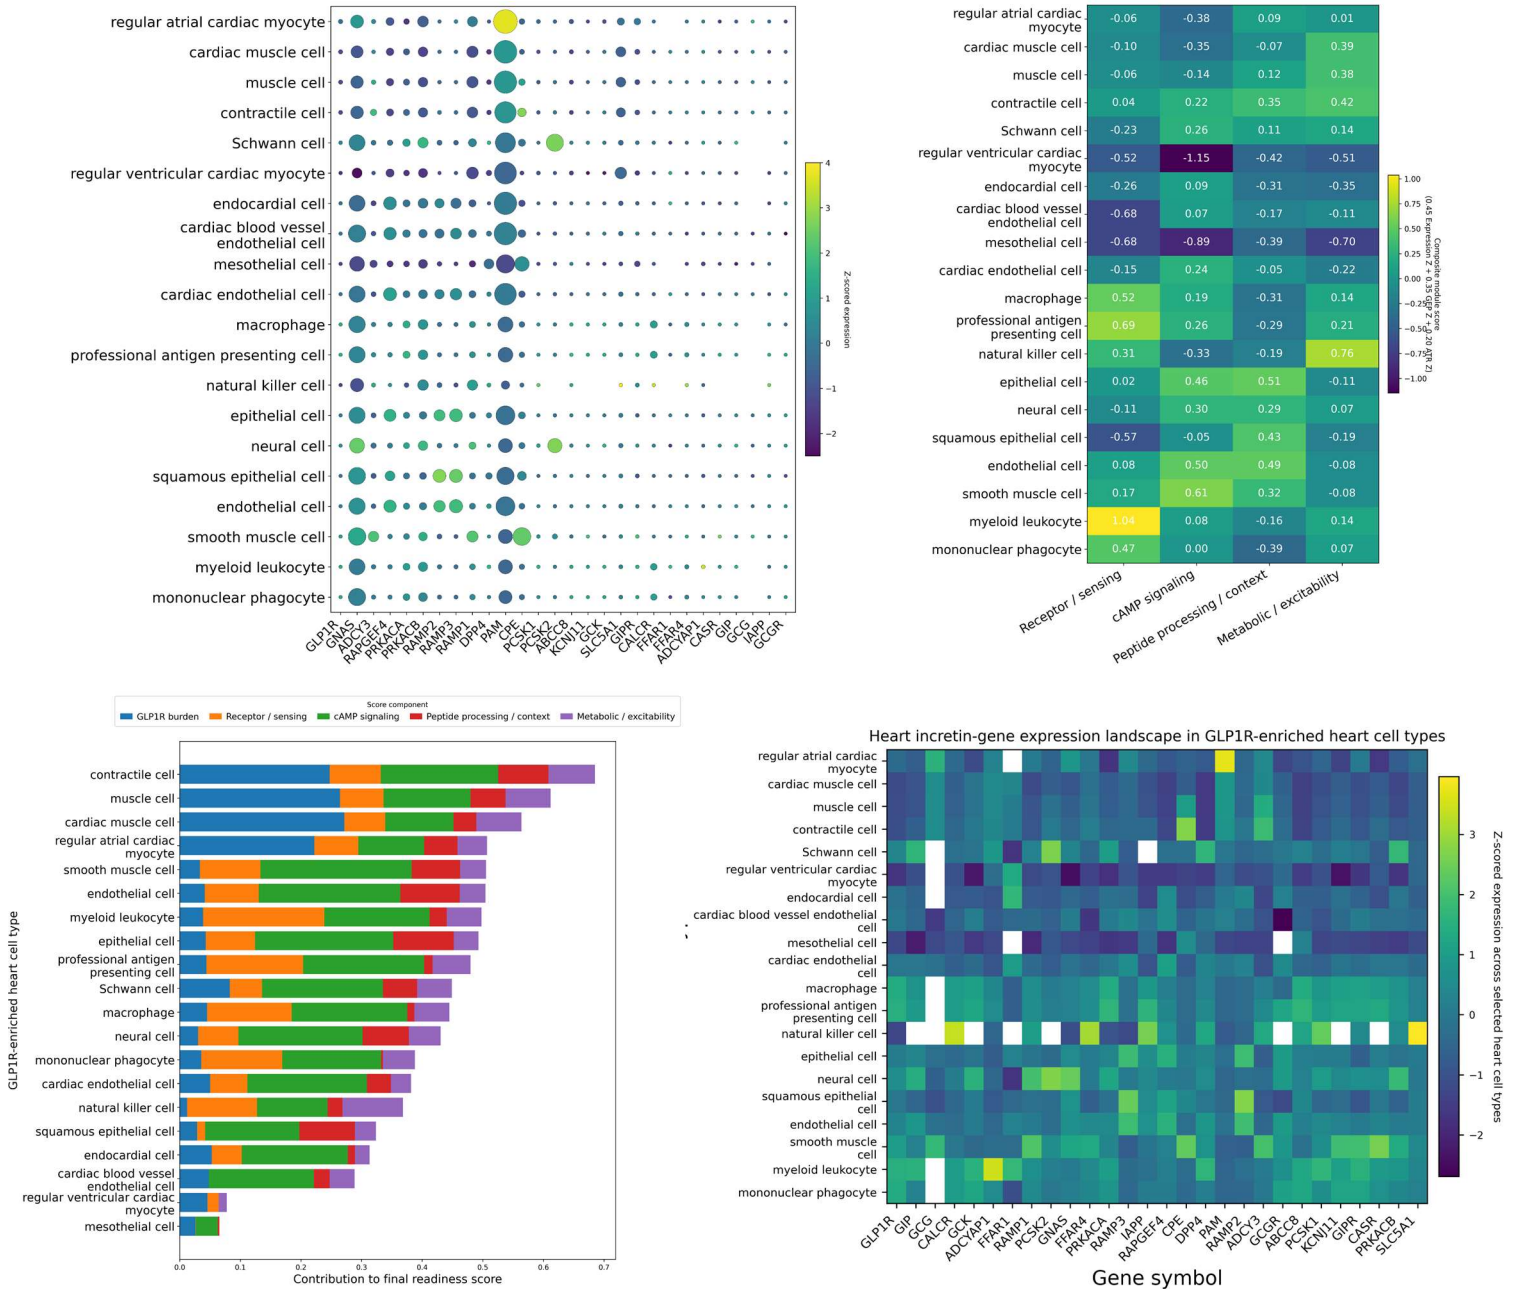

**Fig. S6. System of incretin genes and their expression patterns in single-cell RNA-sequencing data from heart tissue, with emphasis on GLP1R-enriched cardiovascular cell types.** (Top left), Dot plot of semaglutide-relevant genes across GLP1R-enriched heart cell types. Dot size denotes the fraction of cells within each cell type expressing the indicated gene, and dot color denotes gene-wise z-scored expression across the selected heart cell types. (Top Right), Functional module heatmap summarizing semaglutide-response machinery across the same GLP1R-enriched heart cell types. Module scores represent composite z-scored signals derived from receptor and sensing genes, cAMP signaling genes, peptide-processing and contextual-modulation genes, and metabolic or excitability-associated genes. (Bottom Left), Ranked stacked-bar plot of a composite semaglutide functional-readiness score across GLP1R-enriched heart cell types. Total bar length represents the final readiness score, and colored segments denote the relative contribution from GLP1R burden, receptor and sensing context, cAMP signaling, peptide-processing context, and metabolic or excitability-associated programs. (Bottom Right), Heatmap of gene-wise z-scored expression across GLP1R-enriched heart cell types, highlighting coordinated enrichment patterns across cardiomyocyte-contractile, endothelial-epithelial, neuroglial and immune compartments. Together, these panels move beyond receptor detection alone to identify heart cell types that are transcriptionally positioned for potential semaglutide responsiveness.

**Table S1. Clinical evidence of cardiovascular benefits for Semaglutide and Tirzepatide.**

| Drug        | Population / condition                                              | Cardiovascular findings established or supported in humans                                                                                                                                                                                                                         | Evidence tier                                        | Key reference(s)                                                                               |
|-------------|---------------------------------------------------------------------|------------------------------------------------------------------------------------------------------------------------------------------------------------------------------------------------------------------------------------------------------------------------------------|------------------------------------------------------|------------------------------------------------------------------------------------------------|
| Semaglutide | Overweight/obesity with established ASCVD, without diabetes         | Reduced 3-point Major Adverse Cardiovascular Events (MACE), defined as cardiovascular death, nonfatal myocardial infarction, or nonfatal stroke                                                                                                                                    | Randomized trial; label-supporting                   | SELECT / NEJM ( <a href="#">New England Journal of Medicine</a> )                              |
| Semaglutide | Type 2 diabetes with high cardiovascular risk                       | Reduced 3-point MACE versus placebo; strongest individual component signal was for nonfatal stroke; cardiovascular death alone was not significantly reduced                                                                                                                       | Randomized trial                                     | SUSTAIN-6 / NEJM ( <a href="#">New England Journal of Medicine</a> )                           |
| Semaglutide | Obesity-related HFpEF                                               | Improved heart-failure symptoms, physical limitations, exercise function, body weight, inflammatory measures and NT-proBNP; pooled analyses also showed reduction in cardiovascular death or worsening heart-failure events, driven mainly by fewer worsening heart-failure events | Randomized trials / pooled randomized analyses       | STEP-HFpEF / NEJM, Circulation, JACC ( <a href="#">New England Journal of Medicine</a> )       |
| Semaglutide | Obesity/overweight with prevalent heart failure in SELECT           | Improved MACE and a heart-failure composite endpoint; favorable signals for cardiovascular death and all-cause death in the prevalent-heart-failure subgroup                                                                                                                       | Prespecified randomized subgroup analysis            | Deanfield et al. / Lancet ( <a href="#">The Lancet</a> )                                       |
| Semaglutide | ASCVD plus overweight/obesity, without diabetes                     | Associated with lower revised MACE-3, revised MACE-5, all-cause mortality, cardiovascular-related mortality and hospitalization for heart failure                                                                                                                                  | Real-world observational                             | Smolderen et al. / Diabetes Obes Metab, JAHA/JACC-type reports ( <a href="#">PMC</a> )         |
| Semaglutide | Broad clinical-practice comparator analyses                         | Associated with lower myocardial infarction or stroke composite risk versus sitagliptin-like comparator strategies in routine care                                                                                                                                                 | Real-world observational                             | Clinical-practice comparative analyses ( <a href="#">PMC</a> )                                 |
| Tirzepatide | Obesity-related HFpEF                                               | Reduced the composite of cardiovascular death or worsening heart-failure events, largely through fewer worsening heart-failure events; improved health status/KCCQ and exercise tolerance; cardiovascular death alone was not significantly reduced                                | Randomized trial                                     | SUMMIT / NEJM, ACC, Circulation ( <a href="#">New England Journal of Medicine</a> )            |
| Tirzepatide | Type 2 diabetes with established ASCVD                              | Demonstrated cardiovascular noninferiority versus dulaglutide for the composite of cardiovascular death, myocardial infarction, or stroke; superiority for MACE was not established                                                                                                | Randomized CV outcomes trial                         | SURPASS-CVOT / NEJM, ACC ( <a href="#">American College of Cardiology</a> )                    |
| Tirzepatide | Type 2 diabetes, BMI $\geq$ 25, pre-existing ischemic heart disease | Associated with lower risk of a composite of acute myocardial infarction, ischemic stroke and all-cause mortality; acute myocardial infarction and all-cause mortality were individually lower                                                                                     | Real-world observational                             | Dani et al. / JACC Advances-like observational study ( <a href="#">JACC</a> )                  |
| Tirzepatide | Broader real-world comparative analyses                             | Cardiovascular benefit in practice appears broadly comparable to semaglutide overall, with favorable but not definitive signals relative to active comparators                                                                                                                     | Real-world observational / comparative effectiveness | Observational comparative analyses and reviews ( <a href="#">Taylor &amp; Francis Online</a> ) |

**Table S2.** Baseline Demographic and Clinical Characteristics of Semaglutide-Treated Patients by Maximum Dose Reached During the 2-Year Observation Period

| Dosage  | Number of unique patients | Age, Mean (SD) | Female, % | T2DM Prevalence at Baseline, % | Baseline HBA1C, Mean (SD) |
|---------|---------------------------|----------------|-----------|--------------------------------|---------------------------|
| 0.25 mg | 2,192                     | 57.1 (12.6)    | 71.3      | 31.2                           | 6.0 (1.3)                 |
| 0.5 mg  | 3,383                     | 60.1 (12.3)    | 65.3      | 33.4                           | 6.6 (1.7)                 |
| 1.0 mg  | 2,386                     | 59.9 (12.0)    | 63.1      | 40.7                           | 6.9 (1.7)                 |
| 1.7 mg  | 353                       | 53.4 (11.5)    | 75.8      | 46.2                           | 5.7 (0.5)                 |
| 2.0 mg  | 1,095                     | 59.4 (11.7)    | 64.4      | 46.2                           | 6.9 (1.7)                 |
| 2.4 mg  | 1,108                     | 53.6 (10.9)    | 67.5      | 44.9                           | 5.6 (0.6)                 |

**Table S3.** Baseline Demographic and Clinical Characteristics of Low-Dose and High-Dose Semaglutide-Treated Patients During the 2-Year Observation Period.

| Dose group              | Number of unique patients | Age, Mean (SD) | Female, % | Baseline T2DM Prevalence, % | Baseline HBA1C, Mean (SD) | Number of Semaglutide prescriptions, Median [IQR] |                           | Change in Semaglutide prescriptions (Post - Pre landmark), Median [IQR] |
|-------------------------|---------------------------|----------------|-----------|-----------------------------|---------------------------|---------------------------------------------------|---------------------------|-------------------------------------------------------------------------|
|                         |                           |                |           |                             |                           | 0 to 2 years (Landmark period)                    | 2-4 years (Post-landmark) |                                                                         |
| Low Dose (0.25mg - 1mg) | 8,725                     | 59.3 (12.3)    | 65.9      | 30.2                        | 6.6 (1.7)                 | 1 [1-2]                                           | 0 [0-2]                   | -1 [-2, -1]                                                             |
| High Dose (1.7mg+)      | 3,794                     | 57.8 (12.1)    | 66.6      | 27.1                        | 6.4 (1.5)                 | 5 [1-9]                                           | 1 [0-2]                   | -4 [-9, -1]                                                             |

**Table S4.** Semaglutide prescription counts by weight-loss category before and after key treatment landmarks, median [IQR].

| Weight loss Category | Number of unique patients | Number of Semaglutide prescriptions, Median [IQR] |                           |                                           | Change in Semaglutide prescriptions (Post - Pre landmark), Median [IQR] |
|----------------------|---------------------------|---------------------------------------------------|---------------------------|-------------------------------------------|-------------------------------------------------------------------------|
|                      |                           | 0 to 2 years (Landmark period)                    | 2-4 years (Post landmark) | (2 years post max weight loss attainment) |                                                                         |
| <5%                  | 4,050                     | 1 [1, 2]                                          | 0 [0, 2]                  | 0 [0, 2]                                  | -1 [-3, -1]                                                             |
| 5-10%                | 2,805                     | 2 [1, 5]                                          | 0 [0, 2]                  | 0 [0, 2]                                  | -2 [-5, -1]                                                             |
| 10-15%               | 1,943                     | 2 [1, 7]                                          | 0 [0, 2]                  | 1 [0, 2]                                  | -3 [-7, -1]                                                             |
| 15-20%               | 1,223                     | 4 [1, 9]                                          | 1 [0, 2]                  | 1 [0, 2]                                  | -4 [-8, -1]                                                             |
| 20-25%               | 707                       | 5 [1, 10]                                         | 1 [0, 2]                  | 1 [0, 2]                                  | -5 [-9, -1]                                                             |
| 25%+                 | 884                       | 5 [2, 11]                                         | 0 [0, 1]                  | 0 [0, 1]                                  | -4 [-8, -1]                                                             |

**Table S5. Single Cell RNA profile of GLP1R in the human heart.**

| Tissue | Cell Type                                   | Expression ln(CP10K) | % Cells Expressing Genes |
|--------|---------------------------------------------|----------------------|--------------------------|
| heart  | regular atrial cardiac myocyte              | 1.83                 | 1.36                     |
| heart  | cardiac muscle cell                         | 1.77                 | 1.11                     |
| heart  | muscle cell                                 | 1.77                 | 1.05                     |
| heart  | contractile cell                            | 1.77                 | 0.92                     |
| heart  | dermis microvascular lymphatic vessel       | 2.20                 | 0.53                     |
| heart  | endothelial cell                            |                      |                          |
| heart  | Schwann cell                                | 1.88                 | 0.52                     |
| heart  | aggregated                                  | 1.80                 | 0.41                     |
| heart  | cell                                        | 1.80                 | 0.41                     |
| heart  | regular ventricular cardiac myocyte         | 1.72                 | 0.38                     |
| heart  | fetal cardiomyocyte                         | 2.06                 | 0.34                     |
| heart  | endocardial cell                            | 1.84                 | 0.33                     |
| heart  | cardiac blood vessel endothelial cell       | 1.85                 | 0.32                     |
| heart  | mesothelial cell                            | 1.76                 | 0.29                     |
| heart  | neuronal receptor cell                      | 1.69                 | 0.28                     |
| heart  | cardiac endothelial cell                    | 1.85                 | 0.28                     |
| heart  | mature NK T cell                            | 2.58                 | 0.22                     |
| heart  | natural killer cell                         | 1.76                 | 0.21                     |
| heart  | macrophage                                  | 1.97                 | 0.21                     |
| heart  | professional antigen presenting cell        | 1.97                 | 0.20                     |
| heart  | epithelial cell                             | 1.86                 | 0.18                     |
| heart  | squamous epithelial cell                    | 1.85                 | 0.18                     |
| heart  | neural cell                                 | 1.90                 | 0.18                     |
| heart  | endothelial cell                            | 1.88                 | 0.18                     |
| heart  | smooth muscle cell                          | 1.93                 | 0.17                     |
| heart  | cardiac muscle myoblast                     | 1.67                 | 0.16                     |
| heart  | myeloid leukocyte                           | 1.97                 | 0.16                     |
| heart  | myoblast                                    | 1.67                 | 0.16                     |
| heart  | lymphoid lineage restricted progenitor cell | 2.02                 | 0.16                     |
| heart  | hematopoietic precursor cell                | 2.02                 | 0.16                     |
| heart  | endothelial cell of lymphatic vessel        | 1.83                 | 0.15                     |
| heart  | fibroblast                                  | 1.90                 | 0.15                     |
| heart  | mononuclear phagocyte                       | 1.96                 | 0.15                     |
| heart  | blood vessel endothelial cell               | 1.91                 | 0.15                     |
| heart  | endothelial cell of vascular tree           | 1.91                 | 0.15                     |
| heart  | precursor cell                              | 1.70                 | 0.15                     |
| heart  | connective tissue cell                      | 1.90                 | 0.14                     |
| heart  | activated CD8-positive, alpha-beta T cell   | 1.91                 | 0.12                     |
| heart  | adipocyte                                   | 1.74                 | 0.12                     |
| heart  | ventricular cardiac muscle cell             | 2.03                 | 0.12                     |
| heart  | CD4-positive, alpha-beta cytotoxic T cell   | 2.83                 | 0.11                     |
| heart  | mononuclear cell                            | 1.97                 | 0.11                     |
| heart  | pericyte                                    | 1.97                 | 0.11                     |
| heart  | innate lymphoid cell                        | 1.92                 | 0.10                     |
| heart  | leukocyte                                   | 1.96                 | 0.10                     |
| heart  | immature innate lymphoid cell               | 1.99                 | 0.09                     |
| heart  | mural cell                                  | 1.96                 | 0.09                     |
| heart  | perivascular cell                           | 1.96                 | 0.09                     |
| heart  | vein endothelial cell                       | 2.16                 | 0.09                     |
| heart  | myeloid cell                                | 1.93                 | 0.08                     |
| heart  | lymphocyte                                  | 1.97                 | 0.08                     |
| heart  | hematopoietic cell                          | 1.95                 | 0.08                     |
| heart  | fibroblast of cardiac tissue                | 1.74                 | 0.08                     |
| heart  | progenitor cell                             | 2.05                 | 0.08                     |
| heart  | neuron                                      | 1.92                 | 0.08                     |
| heart  | mature alpha-beta T cell                    | 2.39                 | 0.08                     |
| heart  | CD4-positive, alpha-beta T cell             | 2.83                 | 0.06                     |
| heart  | stromal cell                                | 2.59                 | 0.06                     |
| heart  | CD8-positive, alpha-beta T cell             | 1.91                 | 0.05                     |
| heart  | capillary endothelial cell                  | 2.20                 | 0.04                     |
| heart  | smooth muscle myoblast                      | 1.55                 | 0.03                     |
| heart  | T cell                                      | 2.43                 | 0.03                     |
| heart  | vascular associated smooth muscle cell      | 2.25                 | 0.02                     |
| heart  | mesothelial cell of epicardium              | 2.11                 | 0.02                     |
| heart  | monocyte                                    | 2.31                 | 0.01                     |
| heart  | cardiac neuron                              | 1.99                 | 0.01                     |
| heart  | endothelial cell of artery                  | 2.32                 | 0.01                     |

**Table S6.** Constituent medications within the DPP-4 and SGLT2 comparator groups.

| <b>Comparator Group</b> | <b>Constituent Drugs</b>                          |
|-------------------------|---------------------------------------------------|
| DPP-4 inhibitors        | sitagliptin, saxagliptin, linagliptin, alogliptin |
| SGLT2 inhibitors        | empagliflozin, dapagliflozin, canagliflozin       |

**Table S7.** ICD-9 and ICD-10 code definitions for baseline cardiovascular burden phenotypes used in subgroup assignment.

| <b>Phenotype</b>                              | <b>Disease Name</b>                           | <b>ICD10 Code Prefixes</b>                                           | <b>ICD9 Code Prefixes</b>                        |
|-----------------------------------------------|-----------------------------------------------|----------------------------------------------------------------------|--------------------------------------------------|
| Ischemic heart disease                        | Ischemic heart disease                        | I20, I21, I22, I23, I24, I25                                         | 410, 411, 412, 413, 414                          |
| Cerebrovascular disease                       | Cerebrovascular disease                       | I60, I61, I62, I63, I64, I65, I66, I67, I68, I69                     | 430, 431, 432, 433, 434, 435, 436, 437, 438      |
| Hypertension                                  | Hypertension                                  | I10, I11, I12, I13, I14, I15, I16                                    | 401, 402, 403, 404, 405                          |
| Heart failure                                 | Heart failure                                 | I50                                                                  | 428                                              |
| Arrhythmia / Conduction disorders             | Arrhythmias / conduction disorders            | I44, I45, I46, I47, I48, I49                                         | 426, 427                                         |
| Peripheral / Vascular disease atherosclerosis | Peripheral vascular disease / atherosclerosis | I70, I73, I74                                                        | 440, 443, 444                                    |
| Valvular / rheumatic heart disease            | Valvular / rheumatic heart disease            | I00, I01, I02, I05, I06, I07, I08, I09, I34, I35, I36, I37, I38, I39 | 390, 391, 392, 393, 394, 395, 396, 397, 398, 424 |
| Cardiomyopathy                                | Cardiomyopathy                                | I42, I43                                                             | 425                                              |
| Aortic disease                                | Aortic disease                                | I71                                                                  | 441                                              |
| Venous thromboembolism                        | Venous thromboembolism                        | I26, I80, I81, I82                                                   | 415.1, 451, 452, 453                             |

**Table S8.** Interval between index date and most recent qualifying preindex CV diagnosis.

| Cohort           | Cardiovascular subgroup                     | Number of unique patients | Gap to most recent qualifying preindex ICD, median [IQR], d |
|------------------|---------------------------------------------|---------------------------|-------------------------------------------------------------|
| semaglutide      | all cv conditions                           | 53114                     | 108 [26, 340]                                               |
| semaglutide      | aortic disease                              | 1013                      | 416 [165, 740]                                              |
| semaglutide      | arrhythmia conduction disorder              | 10611                     | 214 [49, 639]                                               |
| semaglutide      | cardiomyopathy                              | 1735                      | 197 [50, 672]                                               |
| semaglutide      | cerebrovascular disease                     | 3147                      | 359 [111, 987]                                              |
| semaglutide      | heart failure                               | 4221                      | 137 [36, 431]                                               |
| semaglutide      | hypertension                                | 45704                     | 118 [30, 344]                                               |
| semaglutide      | ischemic heart disease                      | 10206                     | 162 [43, 443]                                               |
| semaglutide      | peripheral vascular disease atherosclerosis | 3745                      | 238 [77, 679]                                               |
| semaglutide      | valvular rheumatic heart disease            | 3441                      | 315 [92, 831]                                               |
| semaglutide      | venous thromboembolism                      | 3122                      | 608 [159, 1,535]                                            |
| metformin        | all cv conditions                           | 132970                    | 55 [6, 264]                                                 |
| metformin        | aortic disease                              | 2911                      | 225 [44, 666]                                               |
| metformin        | arrhythmia conduction disorder              | 25457                     | 139 [13, 590]                                               |
| metformin        | cardiomyopathy                              | 3864                      | 145 [22, 579]                                               |
| metformin        | cerebrovascular disease                     | 10332                     | 239 [38, 831]                                               |
| metformin        | heart failure                               | 9175                      | 81 [9, 374]                                                 |
| metformin        | hypertension                                | 109617                    | 63 [7, 260]                                                 |
| metformin        | ischemic heart disease                      | 30177                     | 128 [15, 496]                                               |
| metformin        | peripheral vascular disease atherosclerosis | 9057                      | 163 [25, 555]                                               |
| metformin        | valvular rheumatic heart disease            | 8439                      | 263 [40, 824]                                               |
| metformin        | venous thromboembolism                      | 6261                      | 346 [41, 1,170]                                             |
| DPP-4 inhibitors | all cv conditions                           | 11875                     | 88 [11, 398]                                                |
| DPP-4 inhibitors | aortic disease                              | 298                       | 282 [80, 764]                                               |
| DPP-4 inhibitors | arrhythmia conduction disorder              | 3105                      | 132 [17, 476]                                               |
| DPP-4 inhibitors | cardiomyopathy                              | 632                       | 181 [32, 588]                                               |
| DPP-4 inhibitors | cerebrovascular disease                     | 1321                      | 233 [54, 808]                                               |
| DPP-4 inhibitors | heart failure                               | 2217                      | 75 [11, 345]                                                |
| DPP-4 inhibitors | hypertension                                | 9558                      | 113 [19, 437]                                               |
| DPP-4 inhibitors | ischemic heart disease                      | 3838                      | 151 [26, 568]                                               |
| DPP-4 inhibitors | peripheral vascular disease atherosclerosis | 1471                      | 165 [39, 533]                                               |
| DPP-4 inhibitors | valvular rheumatic heart disease            | 1221                      | 224 [39, 655]                                               |
| DPP-4 inhibitors | venous thromboembolism                      | 665                       | 298 [36, 1,006]                                             |
| SGLT2 inhibitors | all cv conditions                           | 74169                     | 24 [4, 128]                                                 |
| SGLT2 inhibitors | aortic disease                              | 3577                      | 308 [84, 621]                                               |
| SGLT2 inhibitors | arrhythmia conduction disorder              | 33798                     | 42 [7, 220]                                                 |
| SGLT2 inhibitors | cardiomyopathy                              | 14410                     | 55 [9, 259]                                                 |
| SGLT2 inhibitors | cerebrovascular disease                     | 8543                      | 252 [55, 812]                                               |
| SGLT2 inhibitors | heart failure                               | 34279                     | 21 [4, 105]                                                 |
| SGLT2 inhibitors | hypertension                                | 56957                     | 65 [11, 249]                                                |
| SGLT2 inhibitors | ischemic heart disease                      | 31601                     | 59 [10, 251]                                                |
| SGLT2 inhibitors | peripheral vascular disease atherosclerosis | 10912                     | 154 [35, 468]                                               |
| SGLT2 inhibitors | valvular rheumatic heart disease            | 16479                     | 101 [15, 394]                                               |
| SGLT2 inhibitors | venous thromboembolism                      | 4748                      | 410 [71, 1,323]                                             |

**Table S9.** ICD-9 and ICD-10 code definitions for the composite cardiovascular endpoint, including fatal and nonfatal components.

| Component                                     | ICD10 Code Prefixes                              | ICD9 Code Prefixes                          |
|-----------------------------------------------|--------------------------------------------------|---------------------------------------------|
| All-cause death                               | N/A                                              | N/A                                         |
| Myocardial infarction/Acute coronary syndrome | I21, I22, I23, I24                               | 410, 411                                    |
| Stroke/cerebrovascular event                  | I60, I61, I62, I63, I64, I65, I66, I67, I68, I69 | 430, 431, 432, 433, 434, 435, 436, 437, 438 |

## Supplementary Text

### ***Cardiac GLP1R geography provides biologic plausibility***

The expression data provide a plausible biological framework for this clinical pattern. Prior work has shown that GLP1R is detectable in human cardiac tissue and that cardiac or endocardial/endothelial GLP-1R signaling can mediate cardioprotective effects in experimental systems<sup>7,19</sup>. Our atlas-based analyses extend that rationale in two ways. First, they show that the human heart is not transcriptionally silent for GLP1R at the tissue level. Second, they resolve that signal into distinct cell populations.

Following is a potential dose-stratified interpretation of the cardiac GLP1R atlas. At lower semaglutide exposure, pharmacologic activity may be concentrated in the most prevalent GLP1R-expressing cardiac populations, particularly atrial and broader cardiomyocyte, or contractile-cell compartments, in which GLP1R-positive cells are relatively more frequent (**Table S5**, green-highlighted rows). At moderate to high exposure, engagement may extend to a broader set of less prevalent but still recurrent endothelial, endocardial, vascular-associated, and stromal populations (**Table S5**, yellow-highlighted rows), potentially broadening favorable effects on vascular tone, myocardial loading conditions, endothelial biology and inflammatory signaling. At very high exposure, semaglutide may additionally engage rare GLP1R-expressing immune-cell subsets, including CD4-positive alpha-beta T-cell and related lymphoid compartments (**Table S5**, red-highlighted rows).

### ***Whole-body receptor geography and implications for organ-directed pharmacology***

The whole-body single-cell atlas further refines this interpretation by showing that GLP1R tissue geography depends on how receptor burden is summarized. Prevalence-weighted GLP1R Engagement Potential (GEP) prioritizes tissues in which GLP1R-positive cells are comparatively frequent, whereas Absolute Target Load (ATL) prioritizes tissues containing the largest aggregate reservoir of GLP1R-positive cells. In this framework, systemic metabolic effects and organ-specific cardiovascular effects need not arise from the same receptor geography. Rather, semaglutide exposure may simultaneously engage pancreatic and other whole-body compartments that shape weight loss while also interacting with a substantial cardiac target reservoir capable of supporting direct heart-specific biology.

### ***Distributed GLP1R signaling programs across myocardial, vascular, cardio-immune cells***

Examination of GLP1R signal in the heart shows distribution across several biologically meaningful compartments rather than being restricted to a single rare niche (**Fig. S6 - top left panel**). Cardiomyocyte-contractile states, especially regular atrial cardiac myocytes, cardiac muscle cells, muscle cells and contractile cells, show the strongest overall GLP1R burden, consistent with the idea that the myocardium itself is a major transcript-level reservoir of semaglutide responsiveness. At the same time, the data shows that these cardiomyocyte-like compartments also co-express canonical downstream signaling genes of GLP1R such as GNAS, ADCY3, RAPGEF4, PRKACA and PRKACB, suggesting that receptor detection is embedded

within a productive signaling framework rather than occurring in isolation (**Fig. S6 - top left panel**). Vascular-interface states, including endothelial, cardiac endothelial, endocardial and cardiac blood vessel endothelial cells, show recurrent enrichment of RAMP2, RAMP3, RAPGEF4, DPP4 and related contextual genes, a pattern that is concordant with literature implicating GLP-1 receptor agonists in endothelial protection, vascular anti-inflammatory signaling and attenuation of atherosclerotic biology<sup>4-7</sup>. Finally, myeloid, macrophage and antigen-presenting populations show distinct enrichment of CALCR, ADCYAP1, FFAR1 and related signaling genes, raising the possibility that part of semaglutide's cardiovascular benefit may be mediated through immunometabolic remodeling rather than through cardiomyocytes alone, a concept that is broadly compatible with the known anti-inflammatory and cardiometabolic effects of GLP-1 receptor agonism<sup>4,6,7</sup>.

### ***Computing potential for functional semaglutide-response modules***

We computed a heatmap to distill this gene-level complexity into a functional architecture (**Fig. S6 - top right panel**). Cardiomyocyte-contractile compartments retain comparatively strong receptor burden and appreciable cAMP signaling competence, supporting the interpretation that semaglutide-responsive biology in heart may include direct myocardial interfaces. In contrast, endothelial and epithelial compartments are especially notable for stronger peptide-processing or contextual-modulation signatures, including RAMP2, RAMP3, DPP4, CPE and RAPGEF4, suggesting that these cell types may be particularly important for vascular and tissue-interface responses to GLP-1 receptor agonism (**Fig. S6 - top right panel**). Myeloid leukocytes, macrophages and professional antigen-presenting cells show comparatively prominent receptor and sensing module scores, which is particularly interesting because semaglutide has reduced major adverse cardiovascular events in people with overweight or obesity and established cardiovascular disease in the SELECT trial, while related work increasingly points to inflammatory and vascular mechanisms as important mediators of benefit, beyond weight loss alone<sup>1,4,6,7</sup>. The relatively distinct Schwann-cell and neural-cell module patterns suggest a peripheral neuroglial niche that may participate in incretin biology, but this remains more hypothesis-generating than the vascular-inflammatory axis, for which the clinical and experimental literature is already stronger<sup>4,6,7</sup>.

### ***Towards a composite functional-readiness framework for semaglutide cardiac activity***

The functional-readiness ranking is useful because it prioritizes cell types not simply by GLP1R abundance but by the combination of receptor burden, receptor-context genes, downstream cAMP machinery, peptide-processing capacity and metabolic or excitability-associated effectors (**Fig. S6 - bottom left panel**). In this framework, contractile and muscle-like states rank highly because they combine substantial GLP1R burden with signaling genes such as GNAS, ADCY3 and RAPGEF4 and with downstream contextual genes including CPE and PAM. Smooth-muscle and endothelial-interface states also emerge as highly ranked, which is biologically plausible given the substantial literature on GLP-1 receptor agonist effects on endothelial function, vascular inflammation and atherosclerotic remodeling<sup>6,7</sup>. Myeloid leukocytes, macrophages and antigen-presenting cells rank prominently because they combine receptor-adjacent sensing programs with inflammatory and peptide-context genes, supporting an immunometabolic interpretation of

semaglutide action that is consistent with the cardiovascular and HFpEF clinical data (**Fig. S6 - bottom left panel**). In SELECT, semaglutide lowered cardiovascular event risk in overweight or obesity without diabetes, and in STEP-HFpEF and STEP-HFpEF DM it improved symptoms, physical limitations and exercise-related outcomes in obesity-related HFpEF, indicating that the net cardiovascular phenotype of semaglutide likely reflects integrated myocardial, vascular and inflammatory effects rather than a single-cell-type mechanism<sup>1-4</sup>.

### ***Single cell RNA patterns hint at broad model of possible semaglutide cardiac activity***

The expression heatmap provides the gene-level resolution underlying the higher-order summaries (**Fig. S6 - bottom right panel**). Several striking patterns stand out. First, cardiomyocyte-contractile states show coordinated expression of GLP1R with GNAS, CPE, PAM, RAPGEF4 and ADCY3, supporting a model in which receptor-positive myocardial compartments may be capable of signal transduction rather than merely harboring sparse receptor transcripts. Second, endothelial, epithelial and squamous epithelial states show recurrent RAMP2, RAMP3, RAPGEF4 and DPP4 signals, consistent with an interface biology centered on peptide sensing and vascular or barrier regulation (**Fig. S6 - bottom right panel**). Third, immune and myeloid compartments show notable enrichment of CALCR, ADCYAP1 and FFAR1, suggesting that incretin-adjacent and nutrient-sensing programs may intersect in inflammatory cell states relevant to cardiovascular remodeling. Finally, neural and Schwann compartments show PCSK2-rich signatures, implying specialized neuropeptide-processing capacity. The overall picture is that semaglutide activity potential in heart is most plausibly distributed across three major axes: a myocardial-contractile axis, a vascular-interface axis and an inflammatory-immunometabolic axis, with a smaller neuroglial niche that deserves follow-up. This distributed model is more congruent with current clinical and mechanistic literature than a narrow interpretation based on cardiomyocytes or endothelial cells alone<sup>4-6</sup>.

### ***Implications for endpoint selection, dose optimization and high-dose extrapolation***

The most defensible interpretation of our cumulative single cell RNA analysis is that semaglutide's cardiovascular benefit is unlikely to be explained solely by receptor presence in one dominant heart cell type. Instead, the data support a distributed-response model in which GLP1R-positive cardiomyocyte-contractile cells provide one plausible interface, endothelial and endocardial cells provide a strong vascular-context interface, and macrophage-myeloid populations provide an inflammatory-immunometabolic interface. This interpretation is aligned with the clinical observation that semaglutide reduces cardiovascular events in obesity without diabetes and improves obesity-related HFpEF outcomes, and with mechanistic literature emphasizing vascular protection, reduced endothelial dysfunction and attenuation of inflammatory remodeling as important components of GLP-1 receptor agonist biology<sup>20-24</sup>.

Although weight reduction likely contributes to benefit for selected outcomes, the absence of a consistent monotonic association between achieved weight loss and cardiovascular risk suggests additional organ-directed mechanisms. Semaglutide's cardiovascular effects may therefore reflect not only systemic changes in adiposity, but also direct or indirect actions on cardiac, vascular, and immune biology, including effects on glycemic physiology, blood pressure, vascular

inflammation, endothelial function, myocardial loading conditions, neurohormonal signaling and arrhythmic susceptibility.

These findings have immediate translational implications. Current incretin development and clinical use are often benchmarked primarily against the magnitude of total-body weight reduction. Our results argue that this strategy is too narrow for cardiovascular medicine. In the present framework, weight loss is a whole-body pharmacodynamic readout, but cardiovascular protection may also reflect organ-directed biology. That distinction matters for dose optimization, endpoint selection and cross-drug comparison. More broadly, these data support incorporating dedicated cardiovascular endpoints, and not weight loss alone, into therapeutic optimization.

Extrapolation of this empirical real-world relationship to semaglutide 7.2 mg yields a hypothetical maximum weight change of approximately  $-29.8\%$  over the 2-year landmark period (**Fig. 2**). While our analysis is based on maximum dose reached and the lowest observed pre-landmark weight over 2 years in routine care, the STEP UP trial evaluated a protocolized once-weekly 7.2 mg semaglutide high-dose regimen over 72 weeks. These clinical trial outcomes appear directionally concordant, with STEP UP showing approximately  $20.7\%$  mean loss under the efficacy estimate and  $31.2\%$  of participants achieving at least  $25\%$  weight loss<sup>21</sup>. Our landmark-derived, real-world model based on maximum attained dose and lowest observed pre-landmark weight is closer to an upper-envelope estimate of achievable pharmacologic effect than to a trial-average endpoint measured at a fixed week under protocolized titration, retention, and adherence conditions. In that context, the extrapolated value of  $\sim 29.8\%$  understandably sits above the trial-average response but within the broader range suggested by the high-responder tail of STEP UP. The implication is that real-world pharmacological imputation can be useful for estimating directionality and attainable response range at higher exposures but should not be treated as a one-to-one surrogate for randomized-trial mean efficacy when dose-escalation schedules, treatment persistence, patient selection and endpoint definitions differ.
